# Supplementary material for: Partially delocalized charge in crystalline Co–S–Se/NiOx nanocomposites for boosting electrocatalytic oxygen evolution
Source: Royal Society of Chemistry journal article supplement (doi:10.1039/d1cp05350g), 2022-01-01
Supplement: d1cp05350g1.pdf [file d1cp05350g1.pdf]

## Supporting Information

*Partially Delocalized Charge in Crystalline Co-S-Se/NiO<sub>x</sub>  
Nanocomposites for Boosting Electrocatalytic Oxygen Evolution*

*Wei Deng<sup>1</sup>, Yuping Gai<sup>1</sup>, Haitao Duan<sup>1</sup>, Zhide Chen<sup>1</sup>, Xiaojun Hu<sup>1</sup>, Sheng Han<sup>1</sup>,  
Niwei Xu<sup>2</sup>, Boying Zhang<sup>3</sup>, Shanlin Qiao<sup>3\*</sup>, Zijian Yao<sup>1</sup>, Jun Yu<sup>1</sup>, Fei Jiang<sup>1\*</sup>*

<sup>1</sup> College of Chemical and Environmental Engineering, Shanghai Institute of  
Technology, Haiquan Road 100, Shanghai 201418, China.

<sup>2</sup> College of Medicine Engineering, Hunan Traditional Chinese Medical College,  
Xueshi Road 300, Hunan 410208, China.

<sup>3</sup> College of Chemistry and Pharmaceutical Engineering, Hebei University of Science and  
Technology, Yuxiang Street 26, Shijiazhuang 050018, China.

### The DFT calculation:

All calculations were carried out using the CASTEP program package implanted in Materials Studio of Accelrys Inc.<sup>1</sup> The exchange–correlation functional under the generalized gradient approximation (GGA) with norm-conserving pseudopotentials and Perdew–Burke–Ernzerhof (PBE) functional was adopted to describe the electron–electron interaction.<sup>2</sup> An energy cutoff of 400 eV was used. The ternary Co-S-Se alloy monolayer and its corresponding binary CoS<sub>2</sub> and CoSe<sub>2</sub> monolayer slab model was employed to simulate the surface properties. The reasonable vacuum layers were set around 15 Å in the z-direction for avoiding interaction between planes. A 4×4×1 Monkhorst Pack k-point sampling was chosen for the well converged energy values. Geometry optimizations were pursued until the force on each atom falls below the convergence criterion of 0.02 eV/Å and energies were converged within 10<sup>-5</sup> eV.

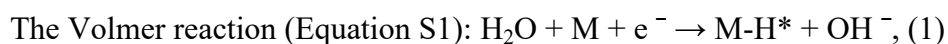

In the alkaline environment, the overall OER process at the anode can be described by the following four-step associative mechanism (Equation S2-S5):

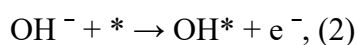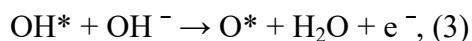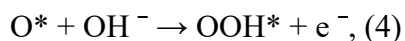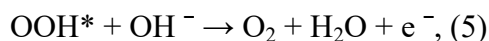

Where \* and M\* represent the active site and the adsorbed intermediate on the surface, respectively.

The Gibbs free energy change for steps 2–5 can be expressed as follows:

$$\Delta G_1 = \Delta G_{\text{OH}^*} - eU, (6)$$

$$\Delta G_2 = \Delta G_{\text{O}^*} - \Delta G_{\text{OH}^*} - eU, (7)$$

$$\Delta G_3 = \Delta G_{\text{OOH}^*} - \Delta G_{\text{O}^*} - eU, (8)$$

$$\Delta G_4 = 4.92[\text{eV}] - \Delta G_{\text{OOH}^*} - eU, (9)$$

Where  $U$  is the applied voltage, in this study,  $U=0$ , and the total free energy ( $\Delta G$ ) to form one molecule of  $\text{O}_2$  was fixed at the value of 4.92 eV in order to avoid the calculation of the  $\text{O}_2$  bond energy, which is difficult to determine accurately within GGA-DFT.

The Gibbs free energy changes of intermediates adsorbed on the surface of catalysts were calculated with zero-point energy and entropy corrections using the following computational formula:  $\Delta G_{\text{ads}} = \Delta E_{\text{ads}} + \Delta \text{ZPE} - T\Delta S$ , (10)

Where  $\Delta \text{ZPE}$ ,  $T$  and  $\Delta S$  are the contributions to the free energy from the zero-point vibration energy, temperature and entropy, respectively. The zero-point energies are calculated from the vibration frequencies. The values of  $\Delta \text{ZPE}$  were determined by the computed vibrational frequencies and the  $-eU$  term represents the external by  $U$  imposed on each step. The entropies are taken from standard tables for molecules. Gas phase  $\text{H}_2\text{O}$  at 0.035 bar is used as the reference state because at this pressure gas phase  $\text{H}_2\text{O}$  is in equilibrium with liquid water at 298 K. The theoretical reaction overpotential  $\eta$  can be obtained evaluating the difference between the minimum voltage needed for the OER and the corresponding voltage needed for changing all the free-energy steps into downhill.

The adsorbed intermediate free energy change  $\Delta E_{\text{ads}}$  for steps 2–5 can be expressed as follows:

$$\Delta E_{\text{OH}^*} = E(\text{OH}^*) - E(^*) - [E(\text{H}_2\text{O}) - 1/2 E(\text{H}_2)], \quad (11)$$

$$\Delta E_{\text{O}^*} = E(\text{O}^*) - E(^*) - [E(\text{H}_2\text{O}) - E(\text{H}_2)], \quad (12)$$

$$\Delta E_{\text{OOH}^*} = E(\text{OOH}^*) - E(^*) - [2E(\text{H}_2\text{O}) - 3/2 E(\text{H}_2)]. \quad (13)$$

Where  $E(^*)$ ,  $E(\text{OH}^*)$ ,  $E(\text{O}^*)$  and  $E(\text{OOH}^*)$  are the total energy of the clean surface and the adsorbed surface with three intermediates, respectively.  $E(\text{H}_2\text{O})$ ,  $E(\text{H}_2)$  and  $E(\text{O}_2)$  are the computed energies for the sole  $\text{H}_2\text{O}$ ,  $\text{H}_2$  and  $\text{O}_2$  molecules, respectively.

The theoretical overpotential  $\eta$  can then be defined as Equation S14:

$$\eta = \max[\Delta G_1, \Delta G_2, \Delta G_3, \Delta G_4]/e - 1.23 \text{ [V]}. \quad (14)$$

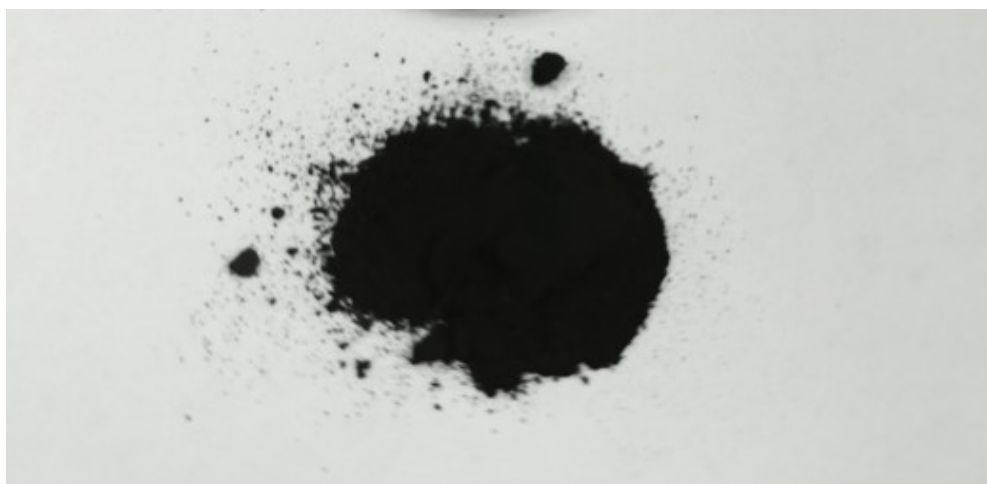

**Figure S1.** The photograph of Co<sub>0.45</sub>S<sub>0.38</sub>Se<sub>0.17</sub> nanosheets.

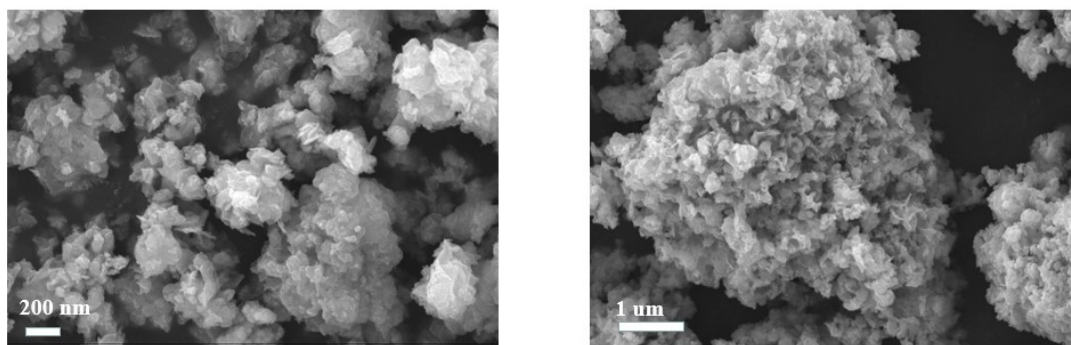

**Figure S2.** SEM of Co<sub>0.45</sub>S<sub>0.38</sub>Se<sub>0.17</sub> nanosheets.

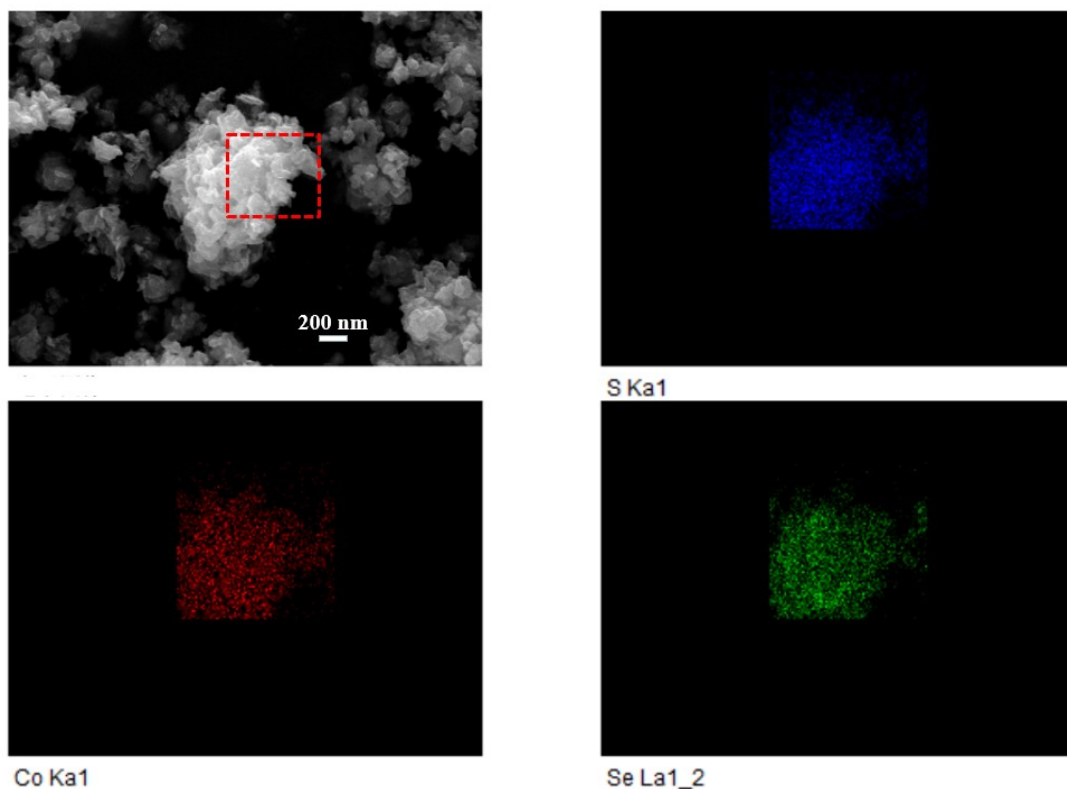

**Figure S3.** The SEM energy dispersive X-ray spectroscopy (EDS) elemental mapping images of  $\text{Co}_{0.45}\text{S}_{0.38}\text{Se}_{0.17}$  nanosheets.

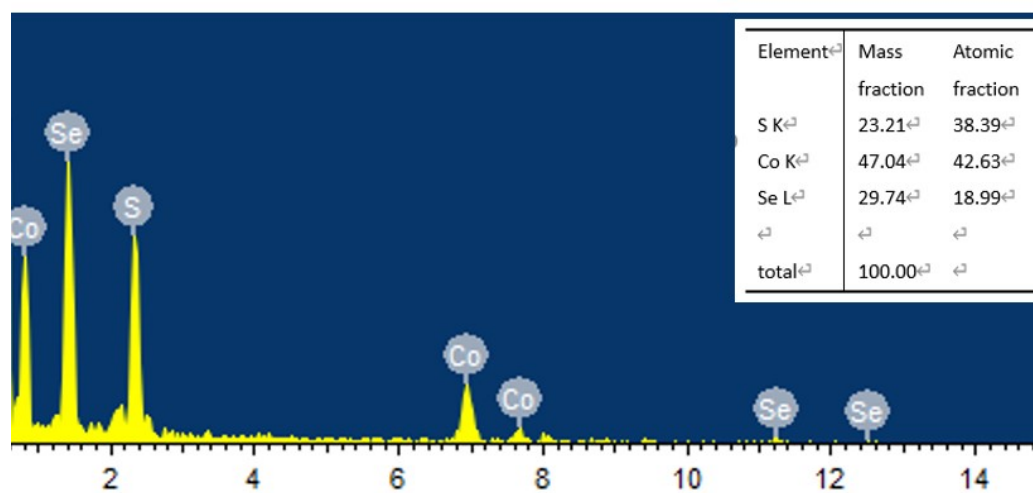

**Figure S4.** The EDS spectrum of Co, S and Se elements in the  $\text{Co}_{0.45}\text{S}_{0.38}\text{Se}_{0.17}$  nanosheets.

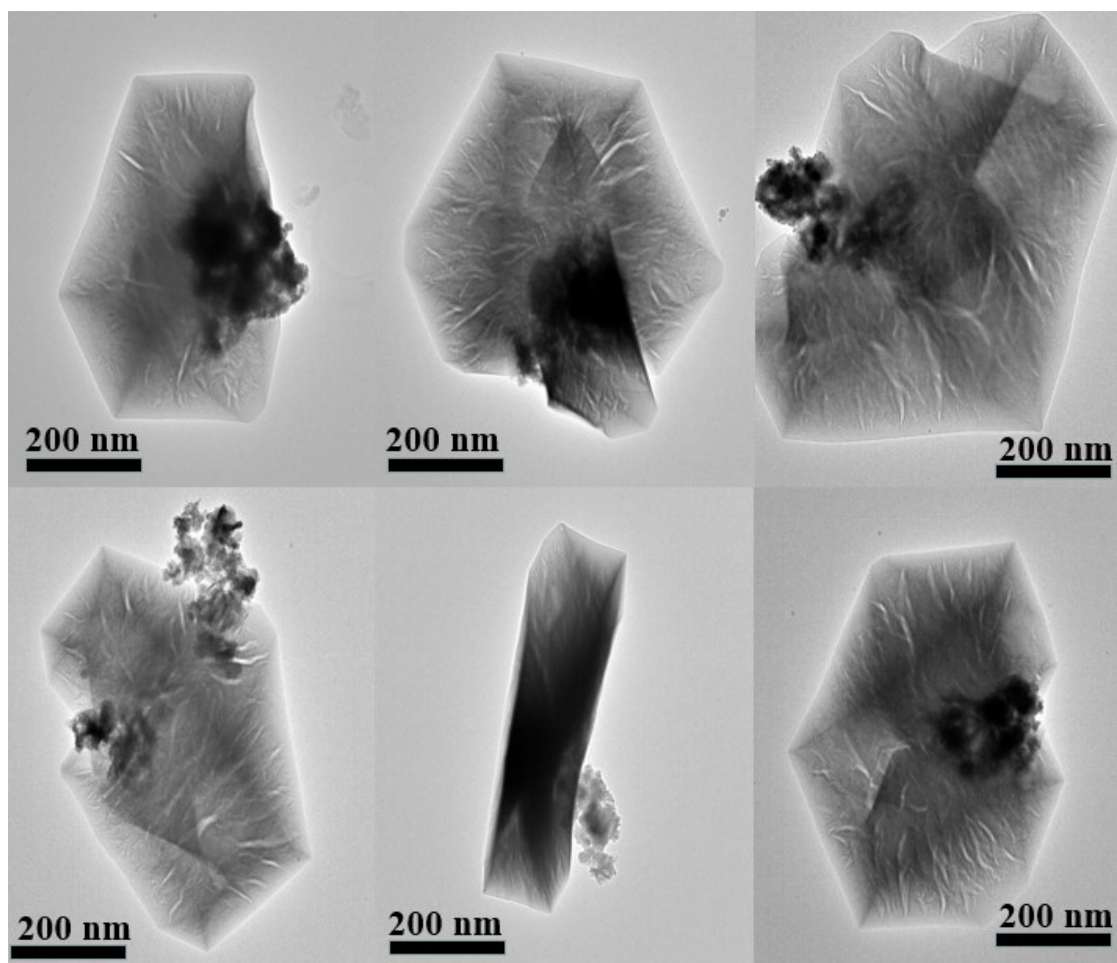

**Figure S5.** The HRTEM spectrum of the  $\text{Co}_{0.45}\text{S}_{0.38}\text{Se}_{0.17}$  nanosheets.

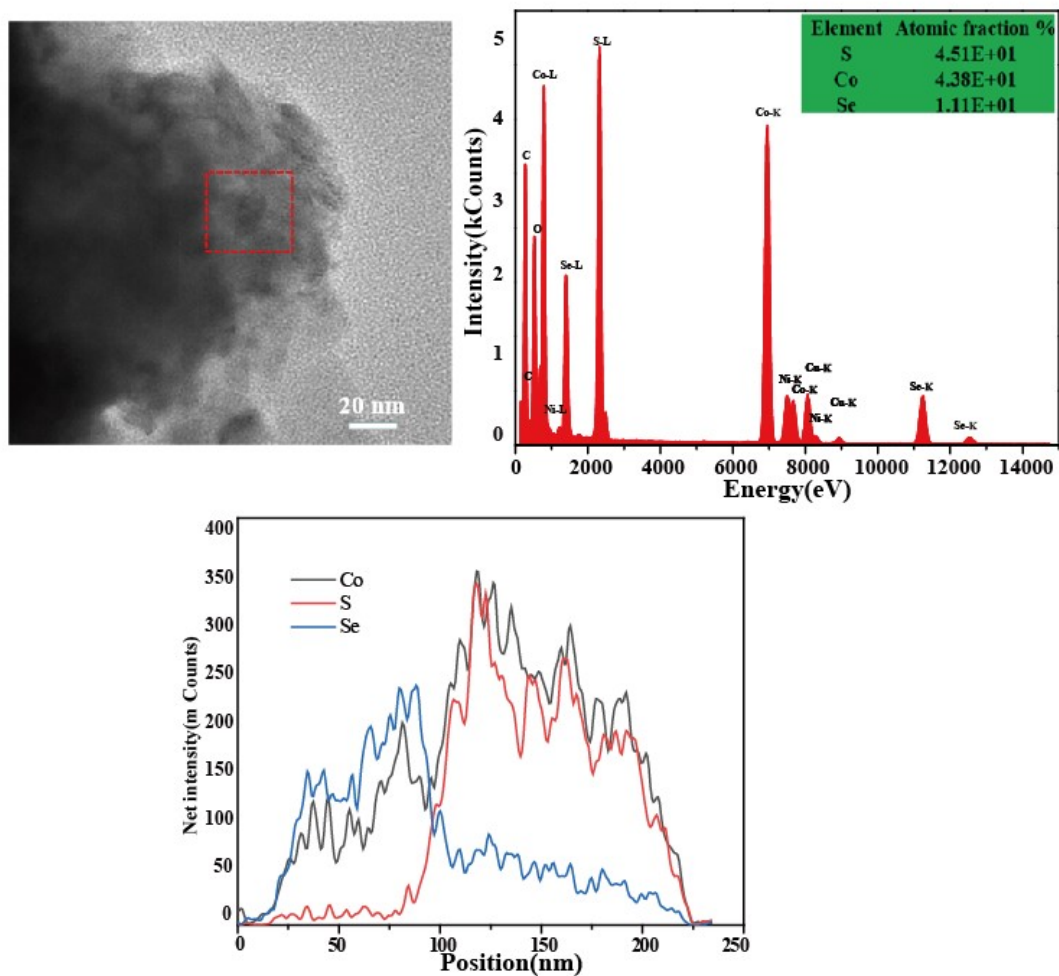

**Figure S6.** HRTEM images and element distribution of the  $\text{Co}_{0.45}\text{S}_{0.38}\text{Se}_{0.17}$  nanosheets.



## X-ray photoelectron spectroscopy (XPS)

XPS full analysis results are shown in **Figure S7-S8**, and the valence band maximum (VBM) is shown in **Figure S9**. All the spectra are adjusted according to the standard value of C 1s peak at  $(284.6 \pm 0.1)$  eV.<sup>3</sup> Decomposition of the XPS spectrum reveals Co, S and Se characteristic peaks.

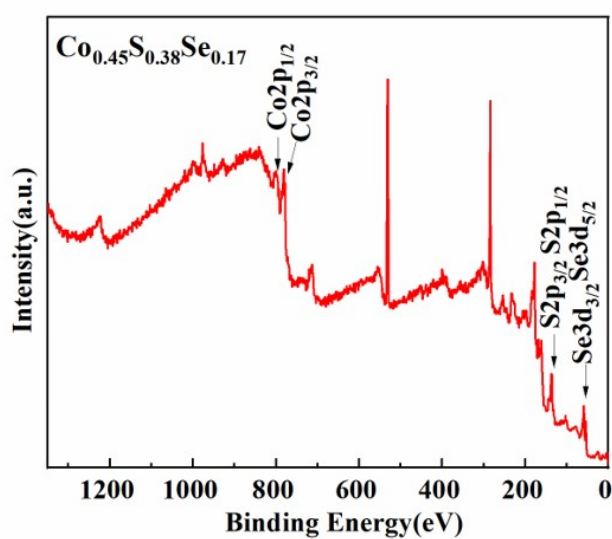

**Figure S7.** Full scans of XPS spectra for  $\text{Co}_{0.45}\text{S}_{0.38}\text{Se}_{0.17}$  nanosheets.

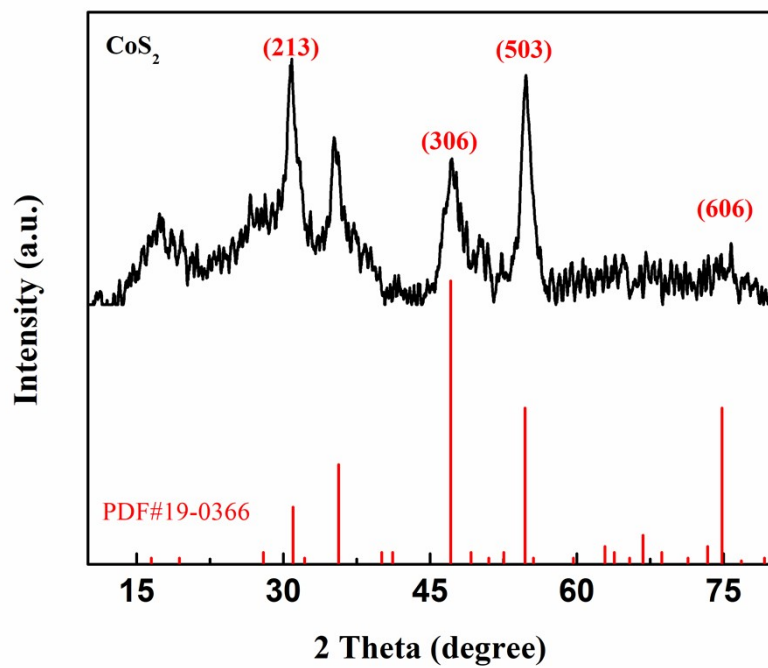

**Figure S8.** (A) XRD for  $\text{CoS}_2$ .

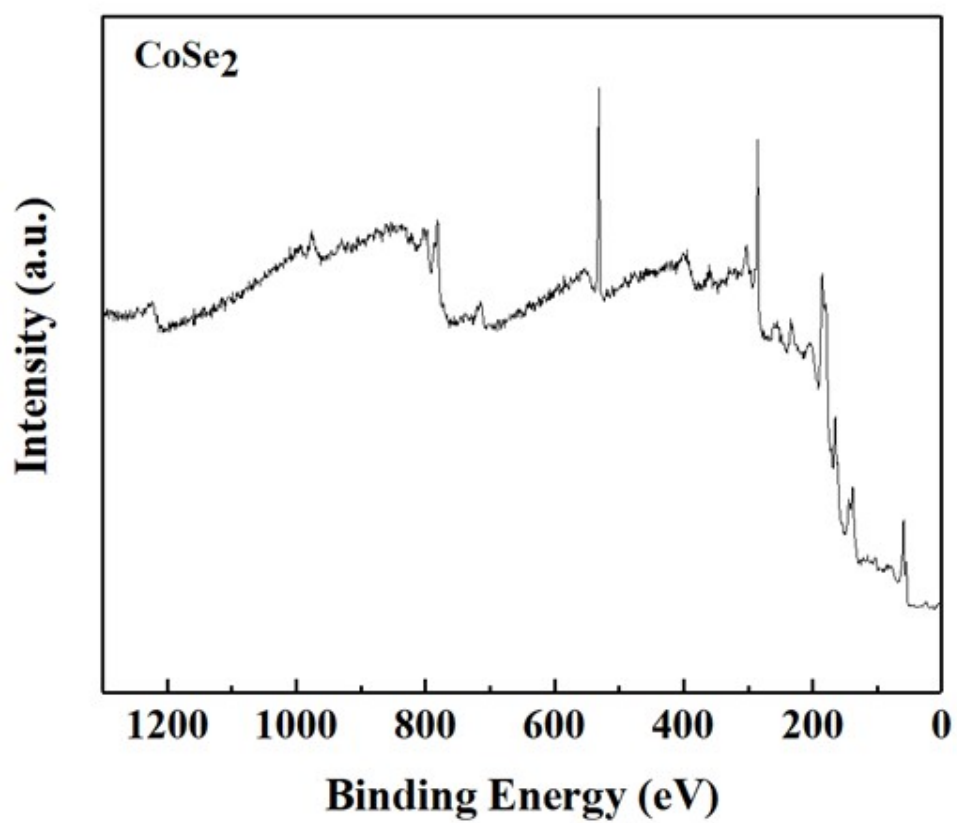

**Figure S8.** (B) Full scans of XPS spectra for CoSe<sub>2</sub>.

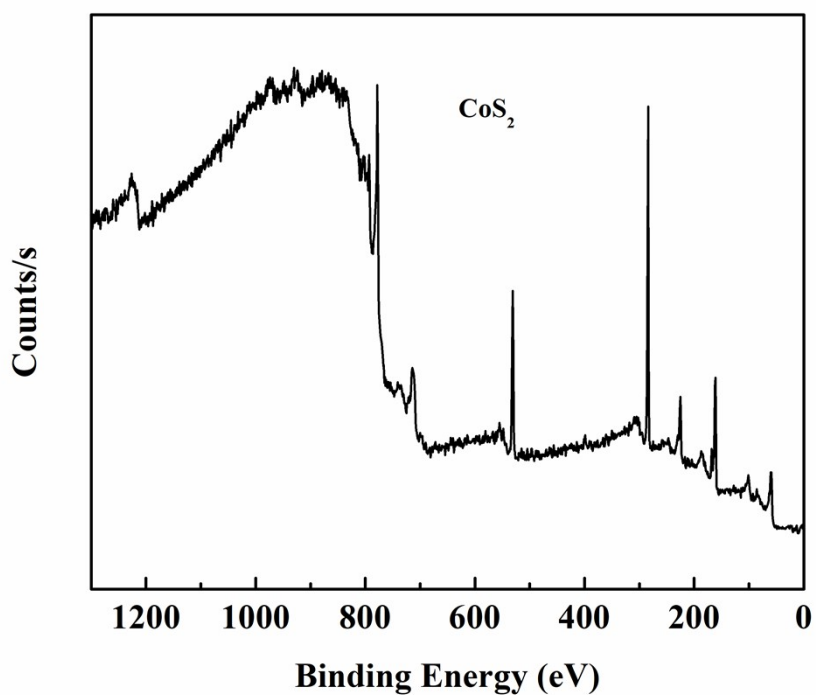

Figure S8. (C) Full scans of XPS spectra for CoS<sub>2</sub>.

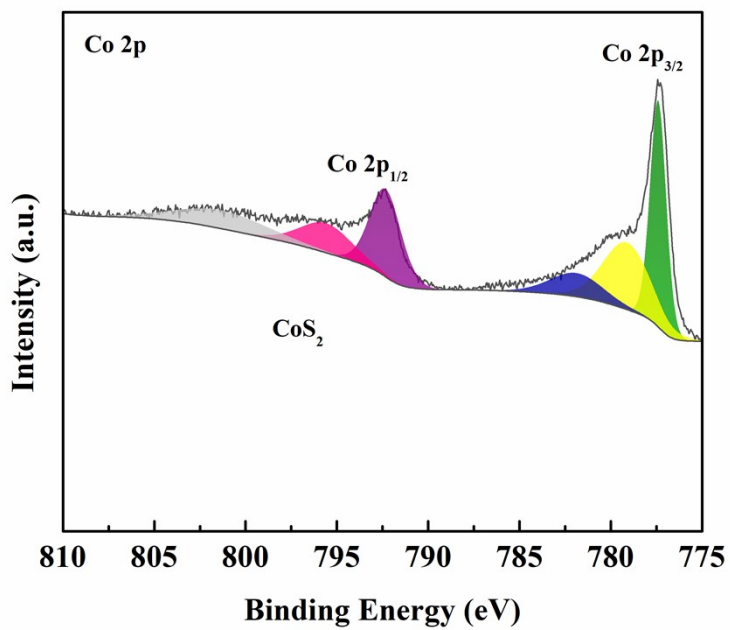

Figure S8. (D) Co 2p spectra for CoS<sub>2</sub>.

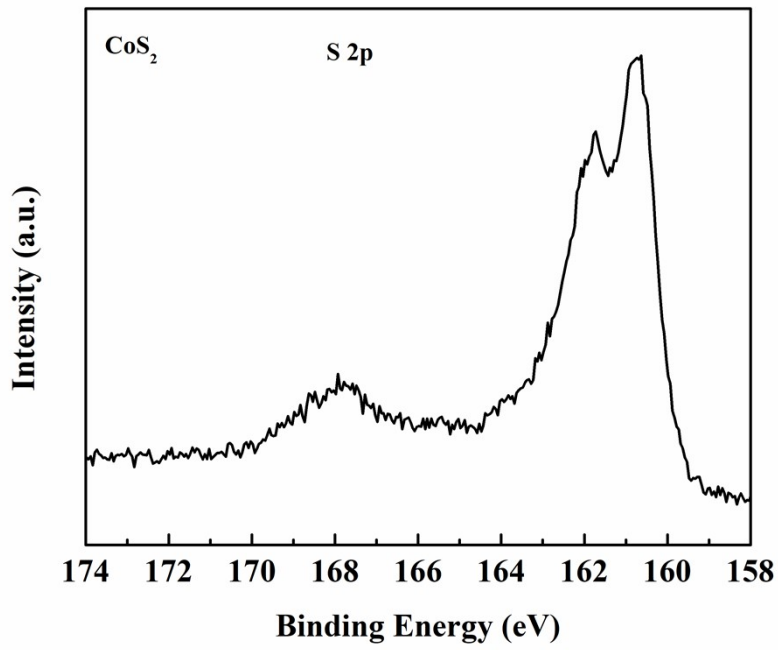

Figure S8. (E) S 2p spectra for CoS<sub>2</sub>.

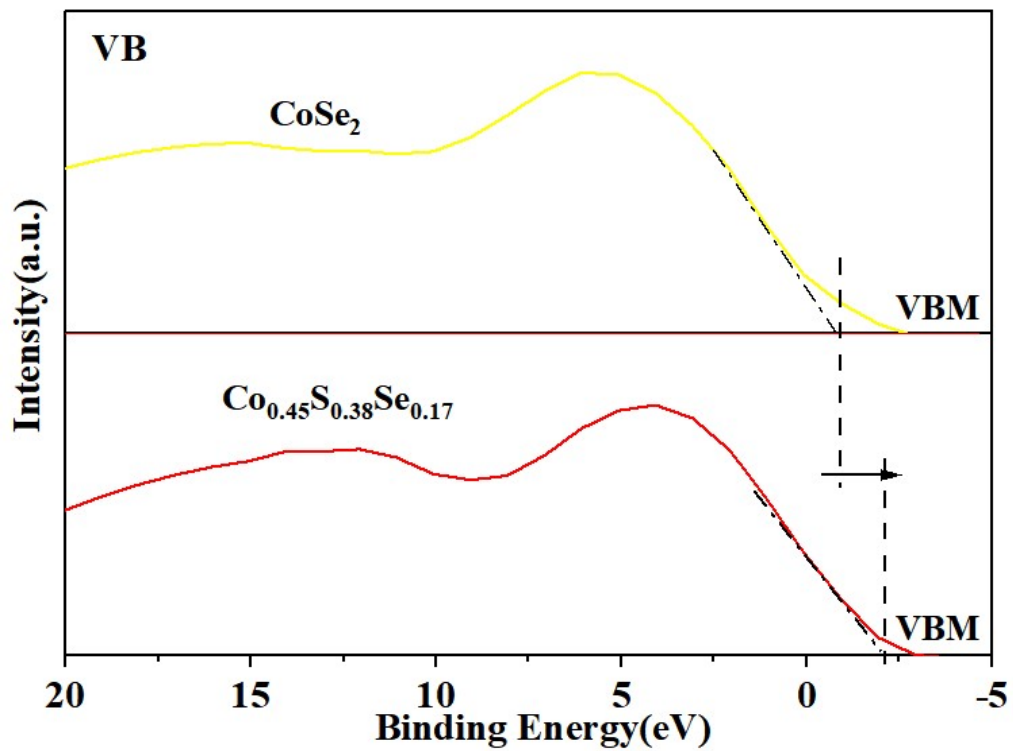

Figure S9. Valence band XPS spectra of Co<sub>0.45</sub>S<sub>0.38</sub>Se<sub>0.17</sub> and CoSe<sub>2</sub>.

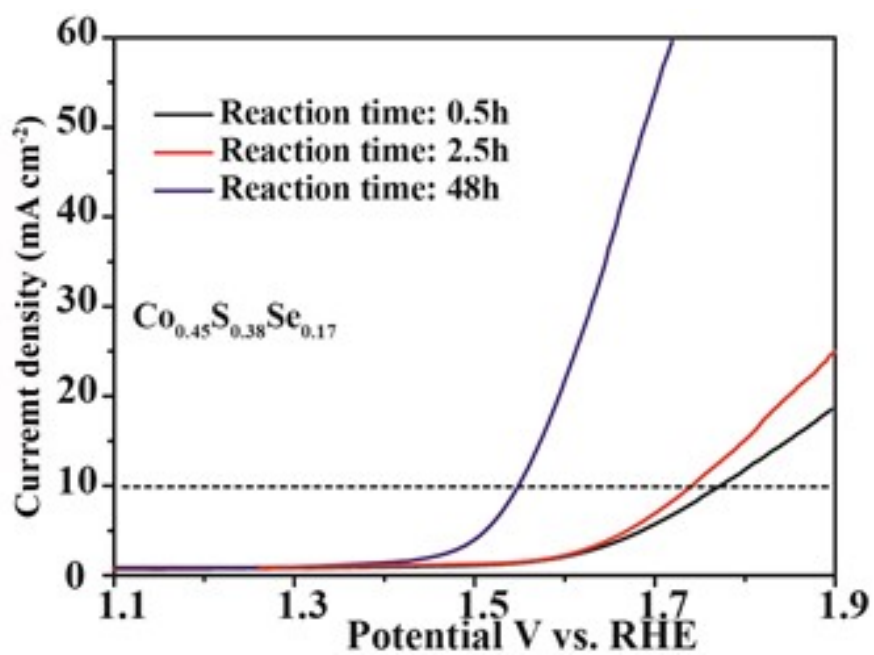

**Figure S10.** LSV curves of  $\text{Co}_{0.45}\text{S}_{0.38}\text{Se}_{0.17}$  products obtained at 200 °C for 0.5 h (black line), 2.5 h (red line) and 48 h (blue line).

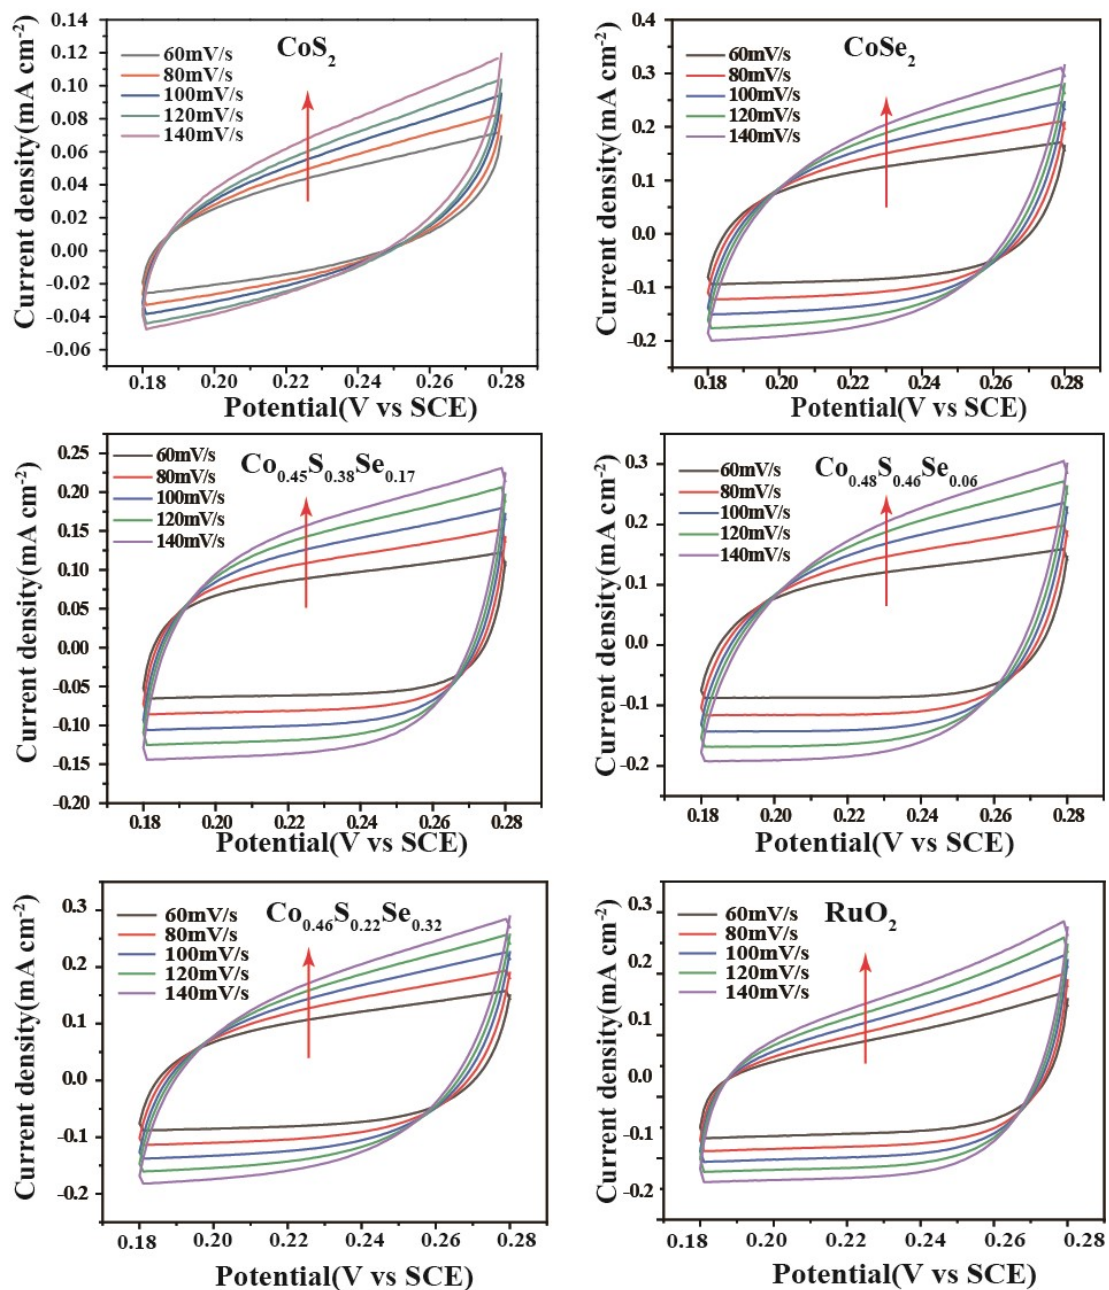

**Figure S11.** CV curves of  $\text{CoS}_2$ ,  $\text{Co}_{0.48}\text{S}_{0.46}\text{Se}_{0.06}$ ,  $\text{Co}_{0.45}\text{S}_{0.38}\text{Se}_{0.17}$ ,  $\text{Co}_{0.46}\text{S}_{0.22}\text{Se}_{0.32}$ ,  $\text{CoSe}_2$  and  $\text{RuO}_2$  in the double layer region at different scan rates.

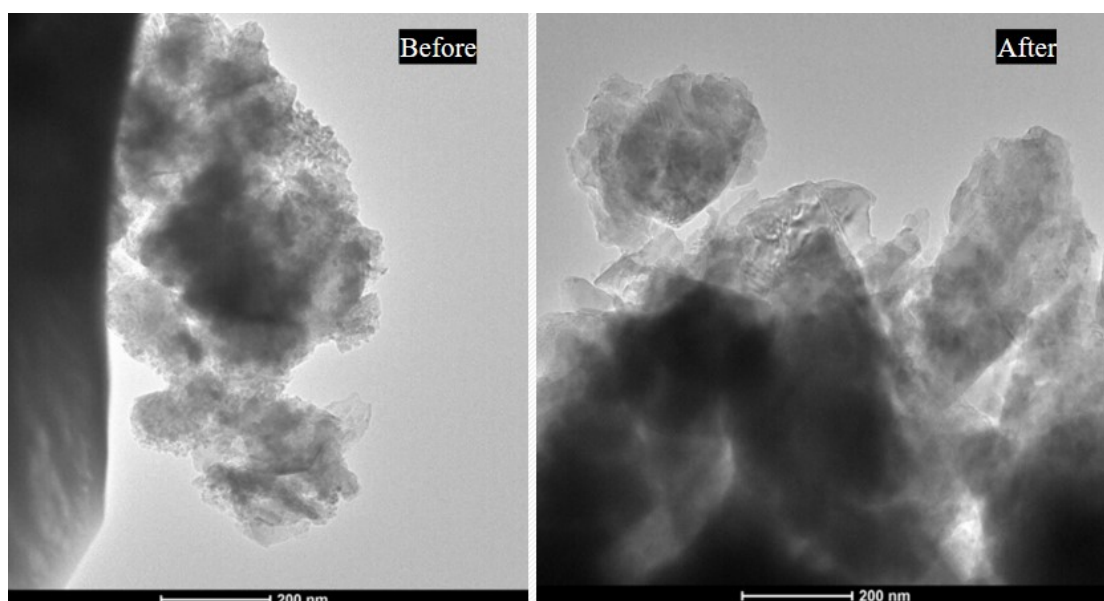

**Figure S12.** The TEM images showed that the Co-S-Se before and after the stability test for OER.



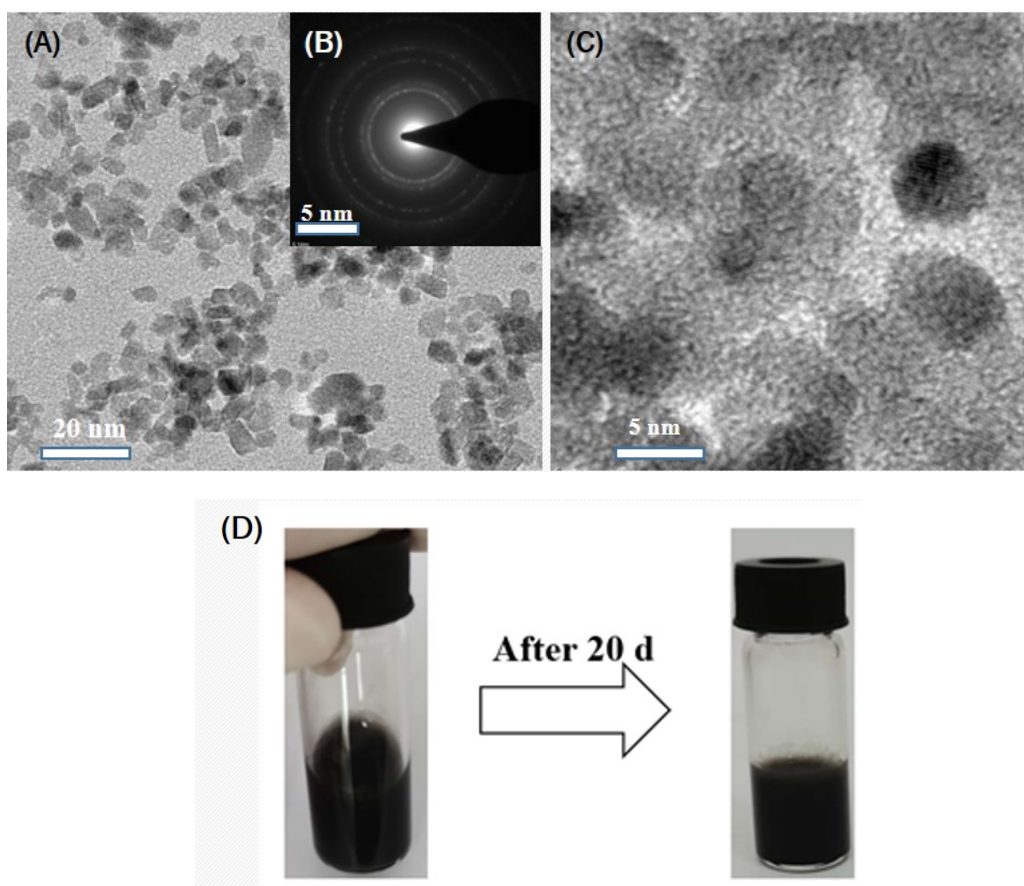

**Figure S13.** (A) TEM image of NiO<sub>x</sub> NPs, inset in (B) is corresponding SAED pattern. (C) HRTEM image of NiO<sub>x</sub> NPs. (D) The photographs of NiO<sub>x</sub> NPs was dispersed in water (30 mg/mL) stored in room temperature in air before and after 20 days.

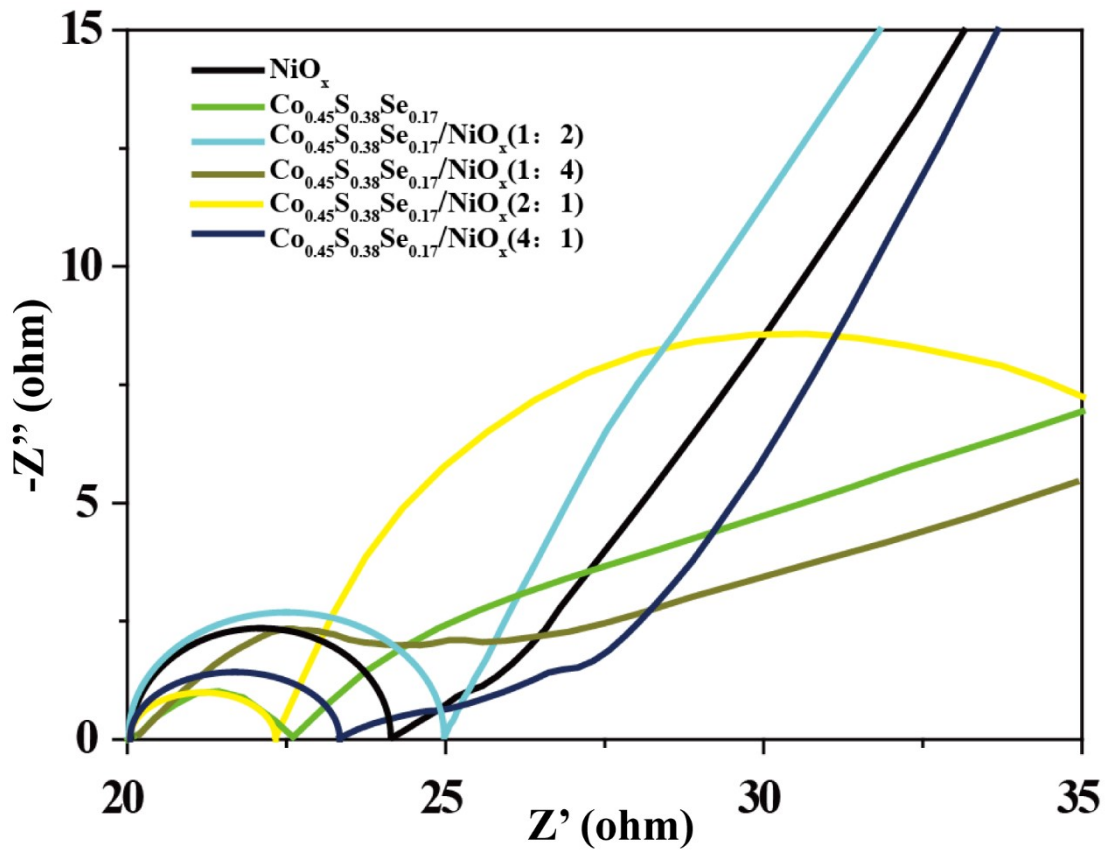

**Figure S14.** EIS plots for  $\text{Co}_{0.45}\text{S}_{0.38}\text{Se}_{0.17}$  recombined with  $\text{NiO}_x$  at different ratios of 1:2, 1:4, 2:1, 4:1 respectively.

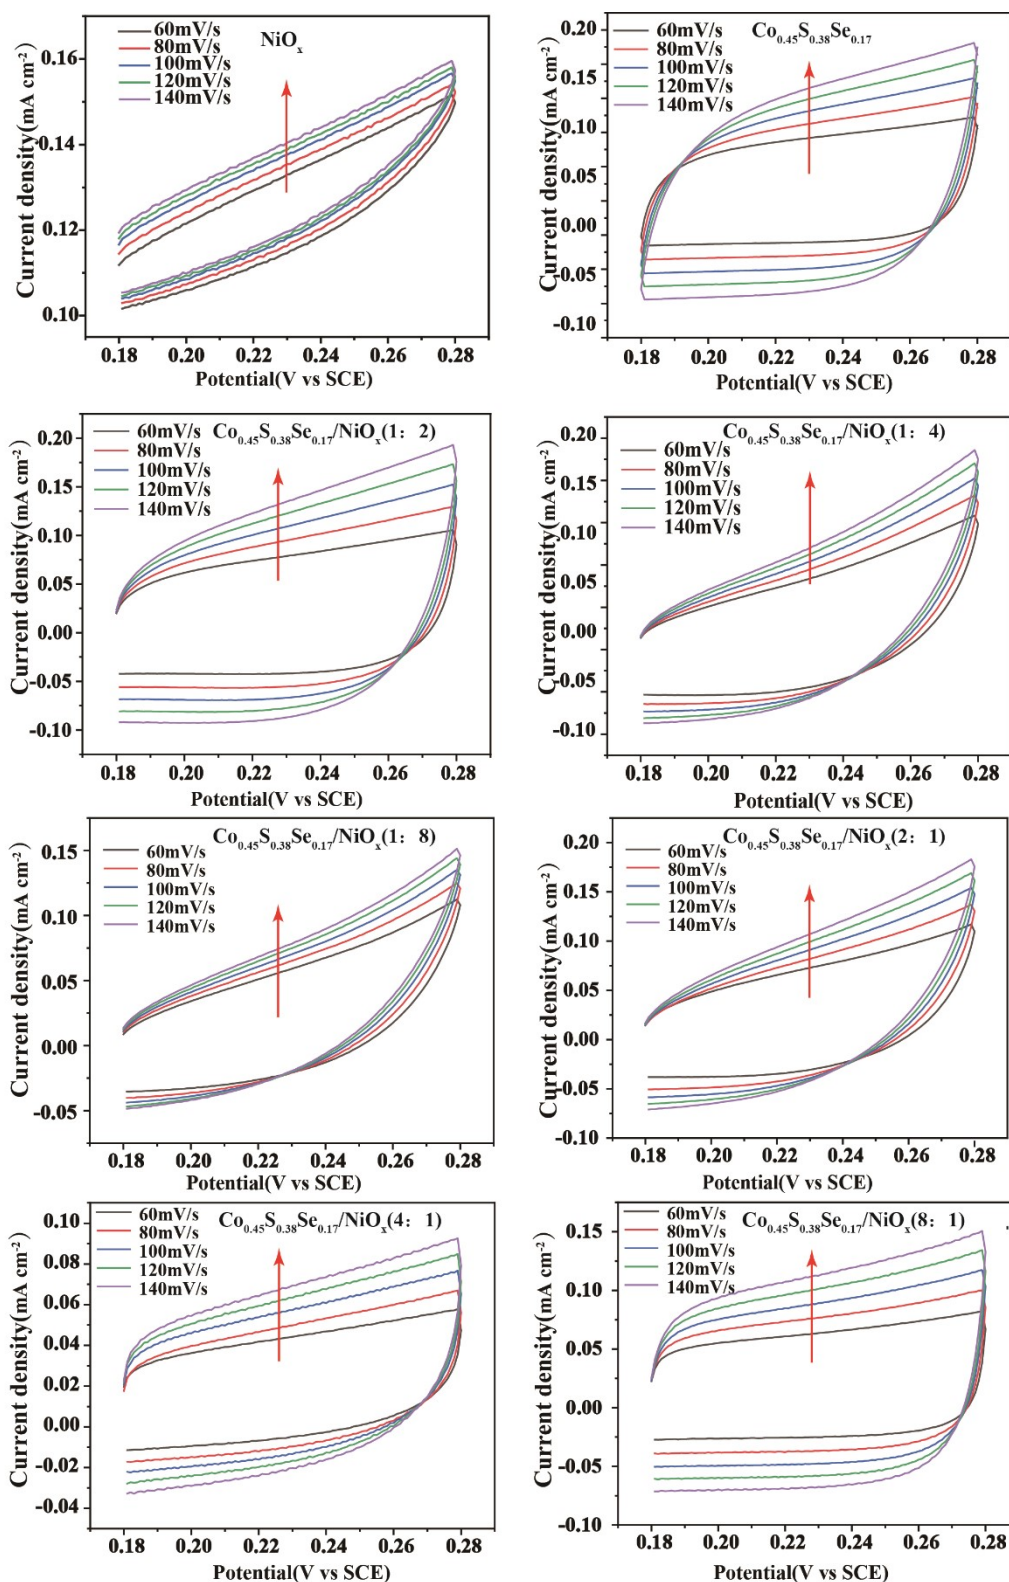

**Figure S15.** CV curves of  $\text{Co}_{0.45}\text{S}_{0.38}\text{Se}_{0.17}$  recombined with  $\text{NiO}_x$  at different ratio of 1:2, 1:4, 1:8, 2:1, 4:1, 8:1 respectively, in the double layer at different scan rates.

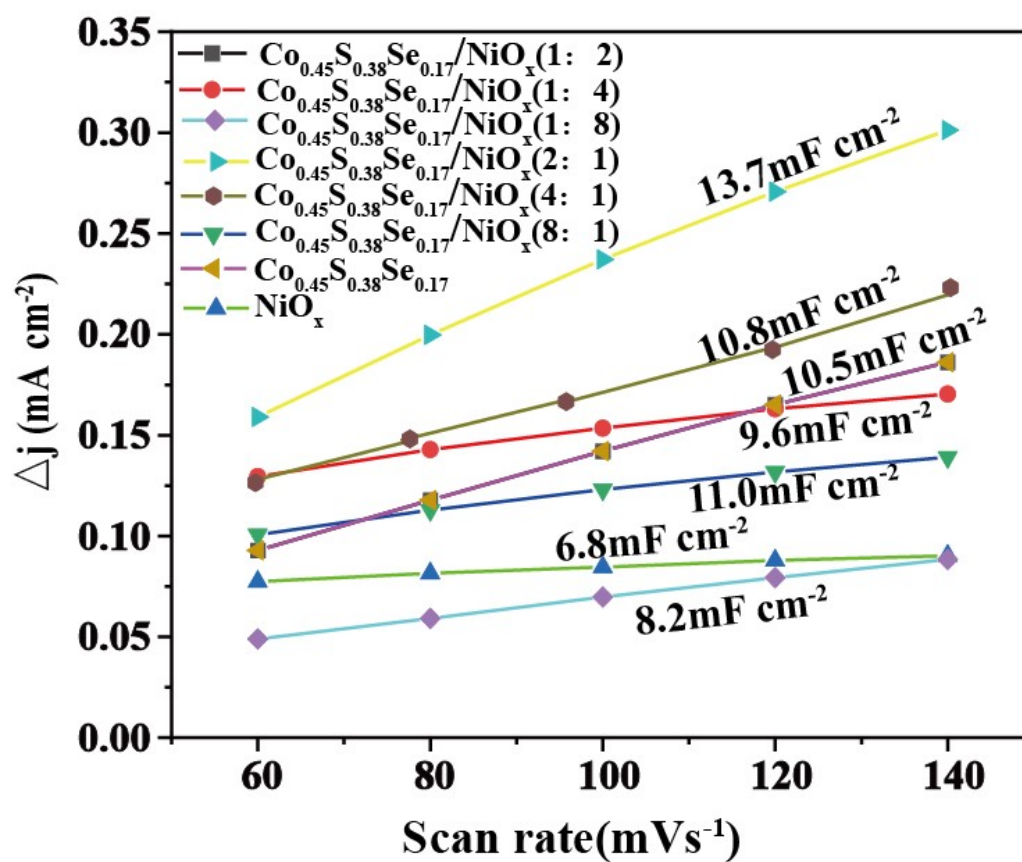

**Figure S16.** Cdl of current density differences plotted against scan rates of  $\text{Co}_{0.45}\text{S}_{0.38}\text{Se}_{0.17}$  recombined with  $\text{NiO}_x$  at different ratio of 1:2, 1:4, 1:8, 2:1, 4:1, 8:1, respectively.

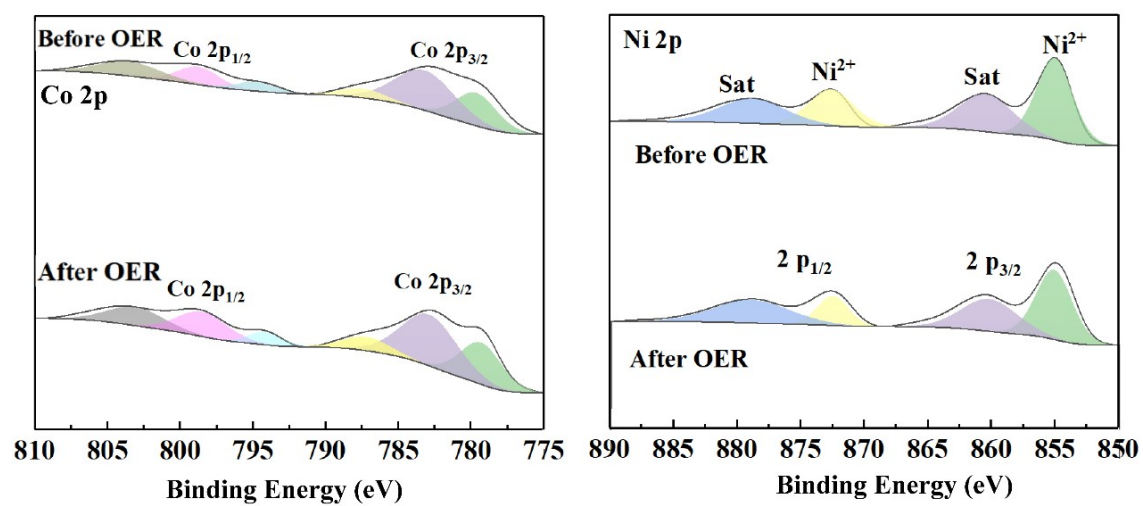

**Figure S17.** XPS spectra of  $\text{Co}_{0.45}\text{S}_{0.38}\text{Se}_{0.17}/\text{NiO}_x\text{-}2:1$  before and after the stability test for OER.

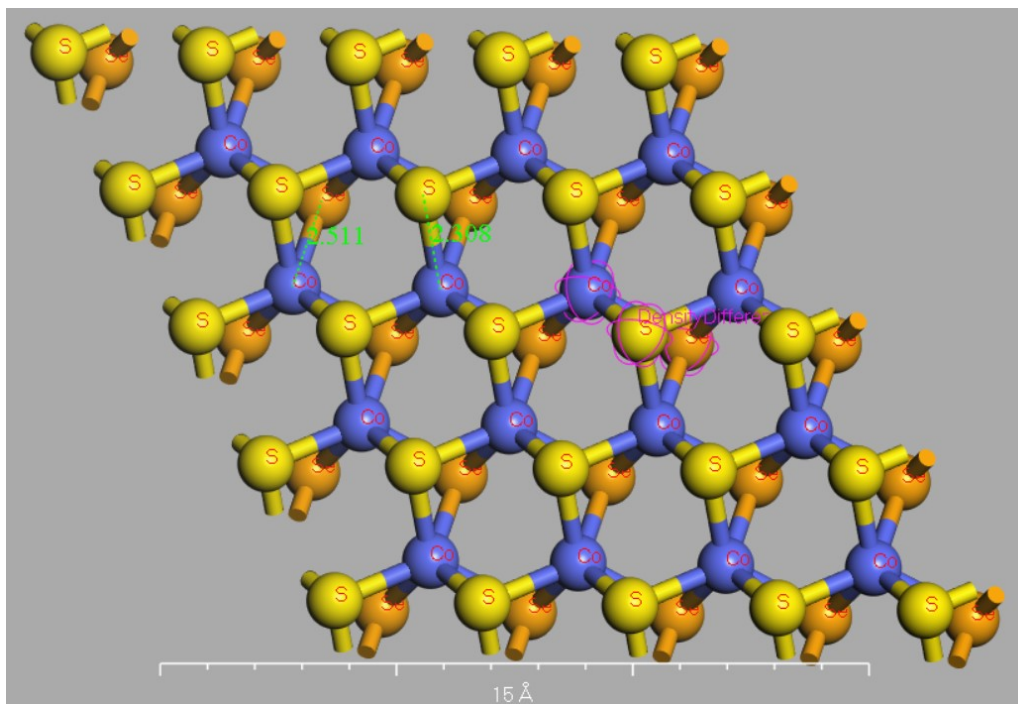

**Figure S18.** Optimized crystal structure for Co-S-Se monolayers and charge density for Co, S, Se atoms on the Co-S-Se monolayers. Bonds length are in Å.

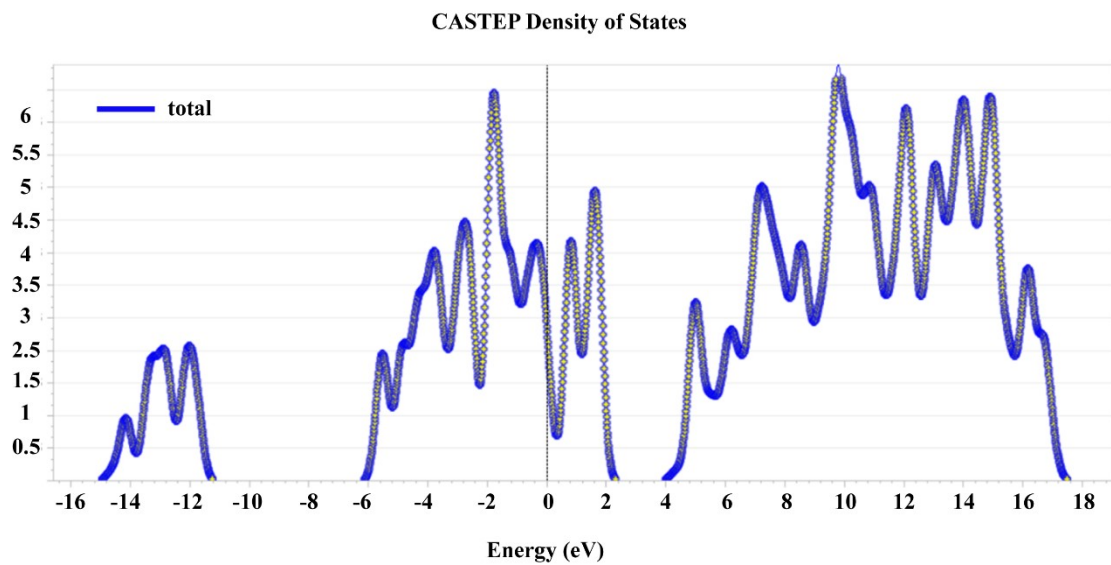

**Figure S19.** Density of states of Co-S-Se monolayers.

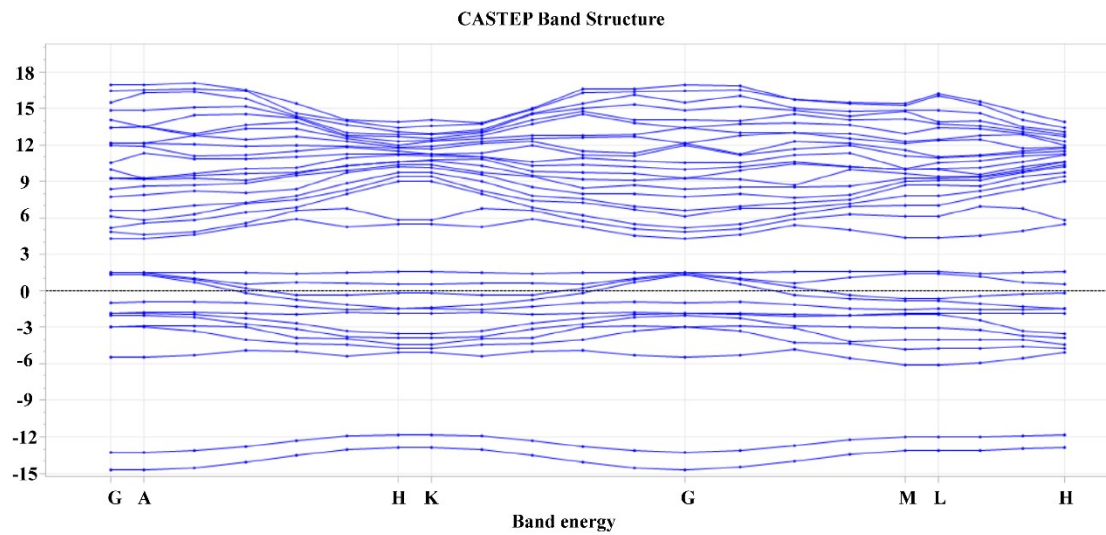

**Figure S20.** Band structure of Co-S-Se monolayers.

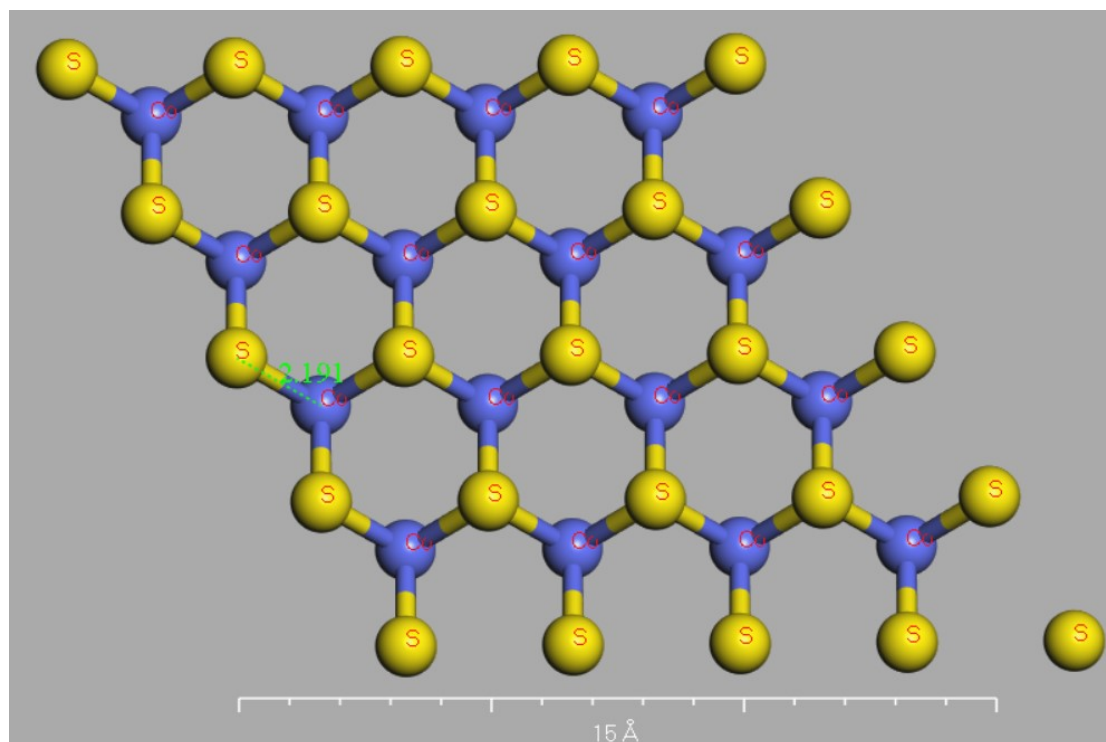

**Figure S21.** Optimized crystal structure for CoS<sub>2</sub> monolayers. Bonds length are in Å.



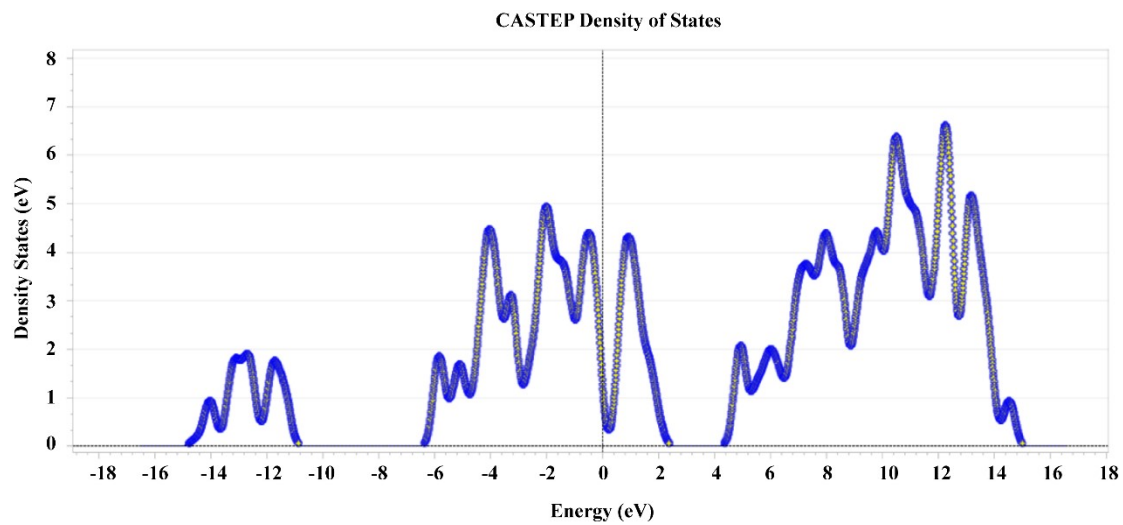

**Figure S22.** Density of states of CoS<sub>2</sub> monolayers.

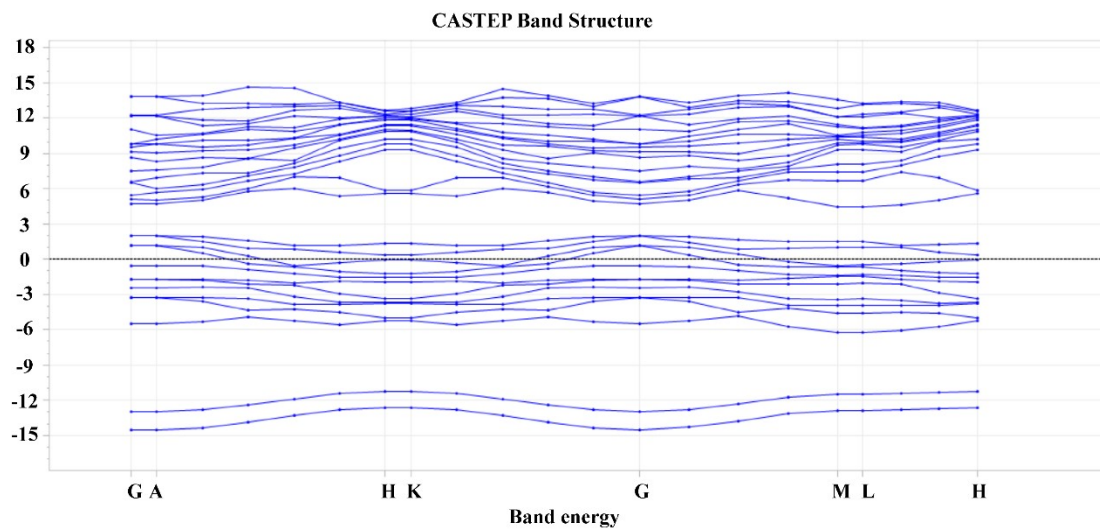

**Figure S23.** Band structure of CoS<sub>2</sub> monolayers.

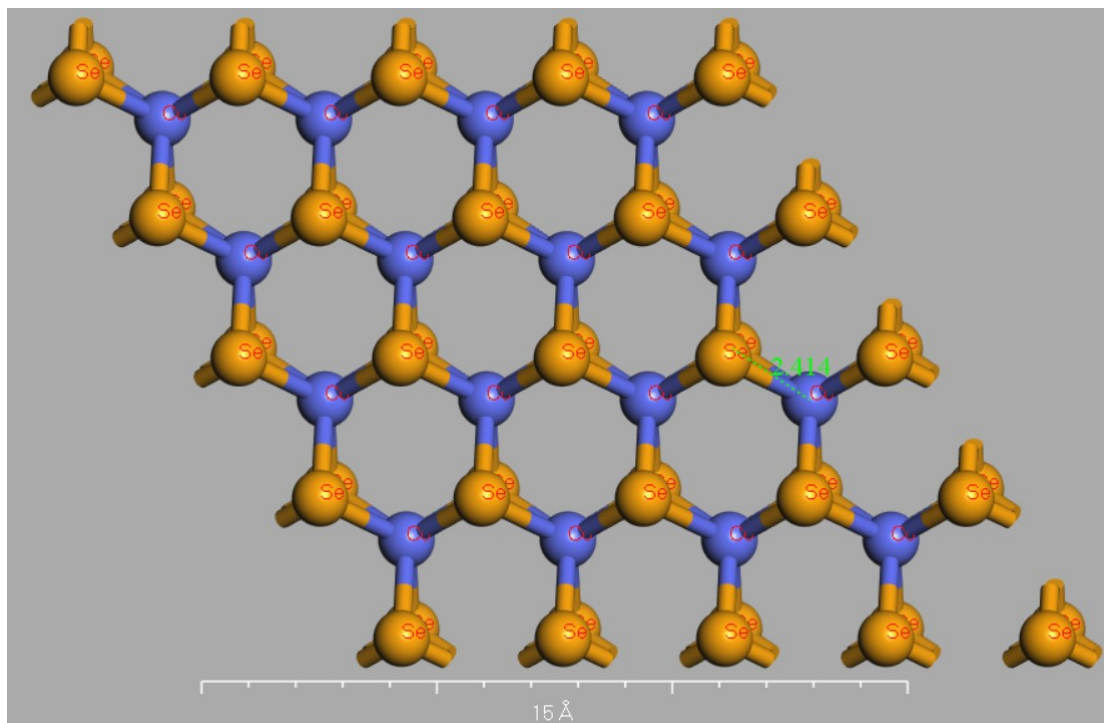

**Figure S24.** Optimized crystal structure for CoSe<sub>2</sub> monolayers. Bonds length are in Å.

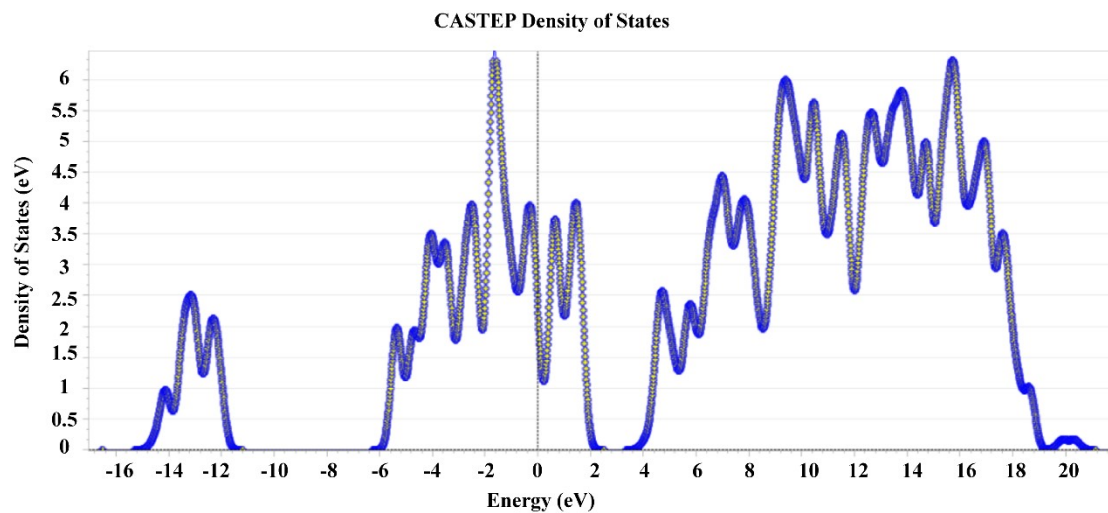

**Figure S25.** Density of states of CoSe<sub>2</sub> monolayers.

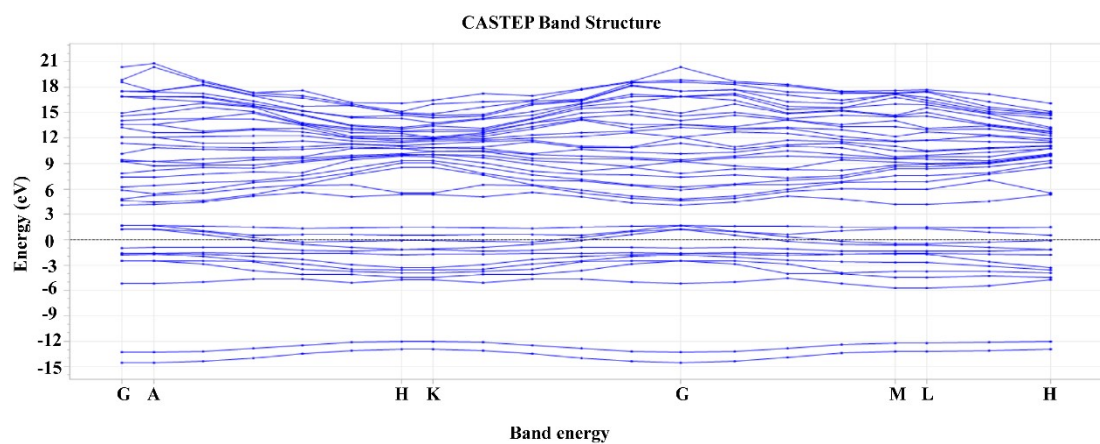

**Figure S26.** Band structure of CoSe<sub>2</sub> monolayers.

## Reference

- [1] Kresse, G.; Hafner, J. Ab initio molecular-dynamics simulation of the liquid metal amorphous semiconductor transition in germanium. *Physical Review B* **1994**, *49*, 14251.
- [2] Perdew, J. P.; Burke, K.; Ernzerhof, M. Generalized Gradient Approximation Made Simple. *Physical Review Letters* **1996**, *77*, 3865.
- [3] Mihailechi, V. D.; Wildeman, J.; Blom, P. W. M. Space-Charge Limited Photocurrent. *Physical Review Letters* **2005**, *94*, 126602.
